# Supplementary material for: Ga doping enhances the oxygen evolution reaction performance and stability of NiFe layered double hydroxides
Source: Royal Society of Chemistry journal article supplement (doi:10.1039/d5ta01310k), 2025-01-01
Supplement: d5ta01310k1.pdf [file d5ta01310k1.pdf]

## Supporting Information

### Ga doping Enhances Oxygen Evolution Reaction Performance and stability of NiFe layered double hydroxides

Zhenghang Tian, Yuanyi Liu, Zhiyuan Chen, Zhi Wan, Jizhou Yang, Peilin Zuo, Mingxin Ren, Peng  
Hu, Feng Teng, Haibo Fan\*

School of Physics, Northwest University, Xi'an 710127, China

\*Corresponding author (E-mail: [hbfan@nwu.edu.cn](mailto:hbfan@nwu.edu.cn))

The experimental part: Prior to testing, calibration of the Hg/HgO electrode was first carried out using a three-electrode system in which a platinum sheet was used as the working electrode and counter electrode. CV scans were performed in 1 M KOH solution in the range of -0.935 to -0.915 V at a scan rate of 1 mV s<sup>-1</sup>. The average of the potentials where the current was equal to zero was used as the potential of the reversible hydrogen electrode (relative to Hg/HgO). Therefore, all potentials reported in our paper were calibrated to the reversible hydrogen electrode (RHE) by equation (2).

#### Supplementary Figures

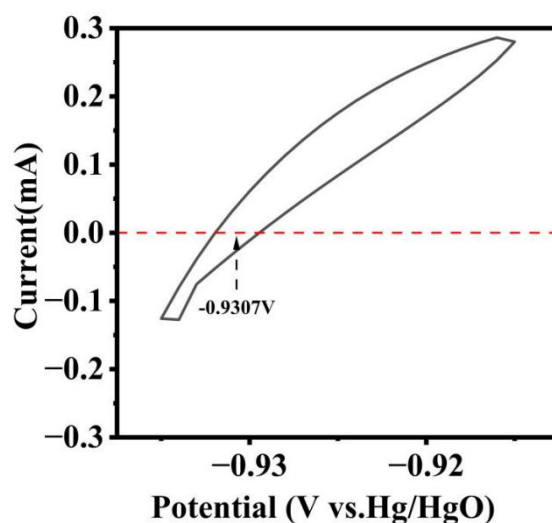

Fig. S1. Hg/HgO reference electrode calibration curve in 1M KOH.

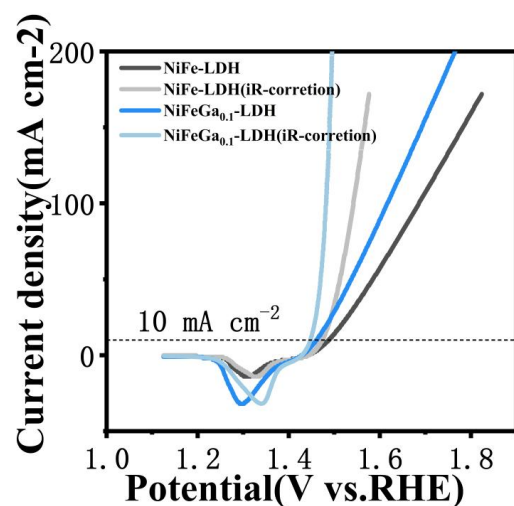

Fig. S2. The LSV curves before and after IR compensation are compared.

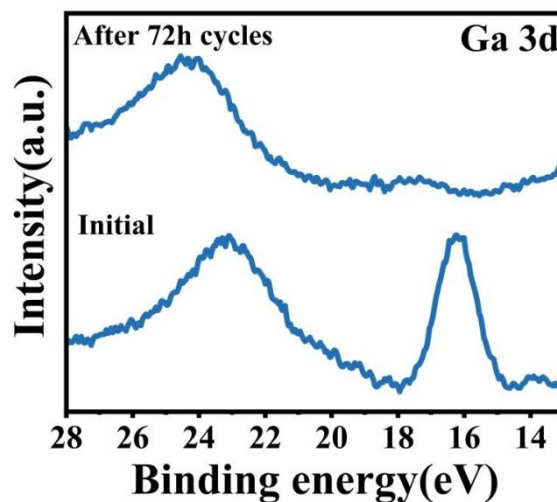

Fig. S3. NiFeGa<sub>0.1</sub>-LDH@NF XPS Ga 3d orbit curve before and after the cycle

## Supplementary Tables

Table. S1. NiFeGa<sub>0.1</sub>-LDH@NF Electrochemical catalytic performance A comparative study of similar types of electrocatalysts recently reported

| Catalysts                        | J (mA cm <sup>-2</sup> ) | $\eta$ (mV) | Stability (h)              | Electrolyte | Ref.      |
|----------------------------------|--------------------------|-------------|----------------------------|-------------|-----------|
| NiFe-LDH Sn <sub>0.015</sub> (M) | 10                       | 250         | 50(1.5V)                   | 1M KOH      | 1         |
| NiFe-LDHS                        | 10                       | 224         | 32(50mA cm <sup>-2</sup> ) | 1M KOH      | 2         |
| Ce@NiFe-LDH                      | 10                       | 220         | 60(1.48V)                  | 1M KOH      | 3         |
| NiFeMo <sub>0.1</sub> -LDH       | 10                       | 227         | 24(1.54V)                  | 1M KOH      | 4         |
| Mn <sup>2+</sup> -doped NiFe-LDH | 10                       | 190         | 40(50mA cm <sup>-2</sup> ) | 1M KOH      | 5         |
| NiFeIr-LDH                       | 10                       | 246         | 12(10mA cm <sup>-2</sup> ) | 1M KOH      | 6         |
| Co@NiFe-LDH                      | 10                       | 253         | /                          | 1M KOH      | 7         |
| NiFeGa <sub>0.1</sub> -LDH       | 10                       | 224         | 72(50mA cm <sup>-2</sup> ) | 1M KOH      | This work |

## References

1. Bera, K. *et al.* Accelerating the Electrocatalytic Performance of NiFe-LDH via Sn Doping toward the Water Oxidation Reaction under Alkaline Condition. *Inorg. Chem.* **61**, 16895–16904 (2022).
2. Shi, D. *et al.* Oxygen vacancies meet partial S substitution: an effective strategy to achieve obvious synergistic effects and adjustable electrochemical behavior in NiFe-LDH for enhanced OER and capacitive performance. *Inorg. Chem. Front.* **10**, 5391–5405 (2023).
3. Nagappan, S. *et al.* Electronically Modified Ce<sup>3+</sup> Ion Doped 2D NiFe-LDH Nanosheets over a 1D Microfiber: A High-Performance Electrocatalyst for Overall Water Splitting. *ACS Appl. Energy Mater.* **5**, 12768–12781 (2022).
4. Lu, Z. *et al.* In Situ Synthesis of Ternary Ni-Fe-Mo Nanosheet Arrays for OER in Water Electrolysis. *Molecules* **30**, 177 (2025).
5. Zhou, D. *et al.* Activating basal plane in NiFe layered double hydroxide by Mn<sup>2+</sup> doping for efficient and durable oxygen evolution reaction. *Nanoscale Horiz.* **3**, 532–537 (2018).
6. Jung, S. *et al.* Exploring Ir-doped NiFe-LDH nanosheets *via* a pulsed laser for oxygen evolution kinetics: *in situ* Raman and DFT insights. *J. Mater. Chem. A* **12**, 8694–8706 (2024).
7. Liu, S. *et al.* Probing the Co role in promoting the OER and Zn-air battery performance of NiFe-LDH: a combined experimental and theoretical study. *J. Mater. Chem. A* **10**, 5244–5254 (2022).
